# Supplementary material for: Evaluation of cerebrovascular reactivity in moyamoya disease using oxygen-dependent magnetic resonance imaging
Source: PubMed Central journal article supplement — iScience. 2024 Jan 19;27(2):108923. doi: 10.1016/j.isci.2024.108923 (PMC10844822; doi:10.1016/j.isci.2024.108923), 2024-01-19
Supplement: mmc1.pdf [file mmc1.pdf]

**iScience, Volume 27**

**Supplemental information**

**Evaluation of cerebrovascular reactivity  
in moyamoya disease using oxygen-dependent  
magnetic resonance imaging**

**Shihao He, Xilong Wang, Hongchuan Niu, Ziqi Liu, Junze Zhang, Xiaokuan Hao, Yanru Wang, Zhenyu Zhou, Yuanli Zhao, and Rong Wang**

## Supplemental Information

Table S1 Statistical results before introducing covariates between patients with Moyamoya disease and healthy controls, related to Figure 1.

|        | Region                                                            | P value after FDR correction | t ratio | q value   |
|--------|-------------------------------------------------------------------|------------------------------|---------|-----------|
| RA Ah  | Right anterior cerebral artery hemisphere                         | <0.000001                    | 6.996   | <0.000001 |
| LA Ah  | Left anterior cerebral artery hemisphere                          | <0.000001                    | 7.103   | <0.000001 |
| RM Ah  | Right middle cerebral artery hemisphere                           | <0.000001                    | 9.08    | <0.000001 |
| RPA h  | Right posterior cerebral artery hemisphere                        | 0.000017                     | 5.073   | 0.00001   |
| LPA h  | Left posterior cerebral artery hemisphere                         | <0.000001                    | 6.385   | <0.000001 |
| LM Ah  | Left middle cerebral artery hemisphere                            | <0.000001                    | 11.97   | <0.000001 |
| RA Ac  | Right anterior cerebral artery callosal                           | 0.000091                     | 4.494   | 0.000041  |
| LA Ac  | Left anterior cerebral artery callosal                            | 0.000015                     | 5.125   | 0.00001   |
| Rma LL | Right middle cerebral artery lateral lenticulostriate             | 0.000456                     | 3.92    | 0.000184  |
| LM All | Left middle cerebral artery lateral lenticulostriate              | 0.000035                     | 4.833   | 0.000017  |
| RPA th | Right posterior cerebral artery thalamic and midbrain perforators | 0.254701                     | 1.161   | 0.064312  |
| LPA th | Left posterior cerebral artery thalamic and midbrain perforators  | 0.168447                     | 1.41    | 0.045368  |
| RA Aml | Right anterior cerebral artery medial lenticulostriate            | 0.000877                     | 3.682   | 0.000295  |
| LA Aml | Left anterior cerebral artery medial lenticulostriate             | 0.00077                      | 3.73    | 0.000283  |
| RPA c  | Right posterior cerebral artery callosal                          | 0.050337                     | 2.036   | 0.014526  |
| LPA c  | Left posterior cerebral artery callosal                           | 0.050154                     | 2.038   | 0.014526  |

Table S2 Statistical results after introducing covariates between patients with Moyamoya disease and healthy controls, related to Figure 1.

|        | Region                                                            | T value   | P value  | P value after FDR correction |
|--------|-------------------------------------------------------------------|-----------|----------|------------------------------|
| RA Ah  | Right anterior cerebral artery hemisphere                         | -8.27E+00 | 3.71E-12 | 1.96E-11                     |
| LA Ah  | Left anterior cerebral artery hemisphere                          | -8.20E+00 | 4.91E-12 | 1.96E-11                     |
| RM Ah  | Right middle cerebral artery hemisphere                           | -9.31E+00 | 3.82E-14 | 3.06E-13                     |
| RPA h  | Right posterior cerebral artery hemisphere                        | -6.60E+00 | 5.08E-09 | 1.35E-08                     |
| LPA h  | Left posterior cerebral artery hemisphere                         | -7.13E+00 | 5.33E-10 | 1.70E-09                     |
| LM Ah  | Left middle cerebral artery hemisphere                            | -1.08E+01 | 0.00E+00 | 0.00E+00                     |
| RA Ac  | Right anterior cerebral artery callosal                           | -5.42E+00 | 6.88E-07 | 1.22E-06                     |
| LA Ac  | Left anterior cerebral artery callosal                            | -6.48E+00 | 8.48E-09 | 1.94E-08                     |
| Rma LL | Right middle cerebral artery lateral lenticulostriate             | -4.78E+00 | 8.38E-06 | 1.34E-05                     |
| LM All | Left middle cerebral artery lateral lenticulostriate              | -5.62E+00 | 3.03E-07 | 6.07E-07                     |
| RPA th | Right posterior cerebral artery thalamic and midbrain perforators | -1.46E+00 | 1.48E-01 | 1.48E-01                     |
| LPA th | Left posterior cerebral artery thalamic and midbrain perforators  | -1.96E+00 | 5.36E-02 | 5.71E-02                     |
| RA Aml | Right anterior cerebral artery medial lenticulostriate            | -4.74E+00 | 9.81E-06 | 1.43E-05                     |
| LA Aml | Left anterior cerebral artery medial lenticulostriate             | -4.61E+00 | 1.64E-05 | 2.18E-05                     |
| RPA c  | Right posterior cerebral artery callosal                          | -3.04E+00 | 3.24E-03 | 3.99E-03                     |
| LPA c  | Left posterior cerebral artery callosal                           | -2.95E+00 | 4.28E-03 | 4.89E-03                     |

Table S3 Statistical results of the comparison between patients with poor compensatory status and patients with normal compensatory status, related to Figure 2.

|       | Region                                                            | P value  | t ratio | q value  |
|-------|-------------------------------------------------------------------|----------|---------|----------|
| RAAh  | Right anterior cerebral artery hemisphere                         | 0.145574 | 1.521   | 0.29406  |
| LAAh  | Left anterior cerebral artery hemisphere                          | 0.029378 | 2.366   | 0.189282 |
| RMAh  | Right middle cerebral artery hemisphere                           | 0.789864 | 0.2705  | 0.876205 |
| RPAh  | Right posterior cerebral artery hemisphere                        | 0.073691 | 1.899   | 0.238168 |
| LPAh  | Left posterior cerebral artery hemisphere                         | 0.268861 | 1.141   | 0.434479 |
| LMAh  | Left middle cerebral artery hemisphere                            | 0.035139 | 2.278   | 0.189282 |
| RAAc  | Right anterior cerebral artery callosal                           | 0.234584 | 1.23    | 0.421208 |
| LAAc  | Left anterior cerebral artery callosal                            | 0.145057 | 1.523   | 0.29406  |
| RmaLL | Right middle cerebral artery lateral lenticulostriate             | 0.567408 | 0.5826  | 0.76411  |
| LMaLL | Left middle cerebral artery lateral lenticulostriate              | 0.011198 | 2.826   | 0.180959 |
| RPAth | Right posterior cerebral artery thalamic and midbrain perforators | 0.963764 | 0.04607 | 0.973402 |
| LPAth | Left posterior cerebral artery thalamic and midbrain perforators  | 0.811178 | 0.2424  | 0.876205 |
| RAAml | Right anterior cerebral artery medial lenticulostriate            | 0.813309 | 0.2397  | 0.876205 |
| LAAml | Left anterior cerebral artery medial lenticulostriate             | 0.442849 | 0.7847  | 0.650586 |
| RPAc  | Right posterior cerebral artery callosal                          | 0.052308 | 2.078   | 0.211326 |
| LPAc  | Left posterior cerebral artery callosal                           | 0.108558 | 1.689   | 0.292382 |

Table S4 Statistical results after introducing covariates of the comparison between patients with poor compensatory status and patients with normal compensatory status, related to Figure 2.

|       | Region                                                            | T value | P value | P value after FDR correction |
|-------|-------------------------------------------------------------------|---------|---------|------------------------------|
| RAAh  | Right anterior cerebral artery hemisphere                         | 1.68    | 0.10    | >0.05                        |
| LAAh  | Left anterior cerebral artery hemisphere                          | 1.79    | 0.08    | >0.05                        |
| RMAh  | Right middle cerebral artery hemisphere                           | 0.09    | 0.93    | >0.05                        |
| RPAh  | Right posterior cerebral artery hemisphere                        | -2.07   | 0.04    | >0.05                        |
| LPAh  | Left posterior cerebral artery hemisphere                         | -1.57   | 0.12    | >0.05                        |
| LMAh  | Left middle cerebral artery hemisphere                            | 1.21    | 0.23    | >0.05                        |
| RAAc  | Right anterior cerebral artery callosal                           | 0.66    | 0.51    | >0.05                        |
| LAAc  | Left anterior cerebral artery callosal                            | 1.27    | 0.21    | >0.05                        |
| RmaLL | Right middle cerebral artery lateral lenticulostriate             | 0.70    | 0.49    | >0.05                        |
| LMaLL | Left middle cerebral artery lateral lenticulostriate              | 2.36    | 0.02    | >0.05                        |
| RPAth | Right posterior cerebral artery thalamic and midbrain perforators | -0.16   | 0.87    | >0.05                        |
| LPAth | Left posterior cerebral artery thalamic and midbrain perforators  | 0.18    | 0.86    | >0.05                        |
| RAAml | Right anterior cerebral artery medial lenticulostriate            | 0.22    | 0.83    | >0.05                        |
| LAAml | Left anterior cerebral artery medial lenticulostriate             | 0.71    | 0.48    | >0.05                        |
| RPac  | Right posterior cerebral artery callosal                          | -1.89   | 0.06    | >0.05                        |
| LPac  | Left posterior cerebral artery callosal                           | -1.79   | 0.08    | >0.05                        |

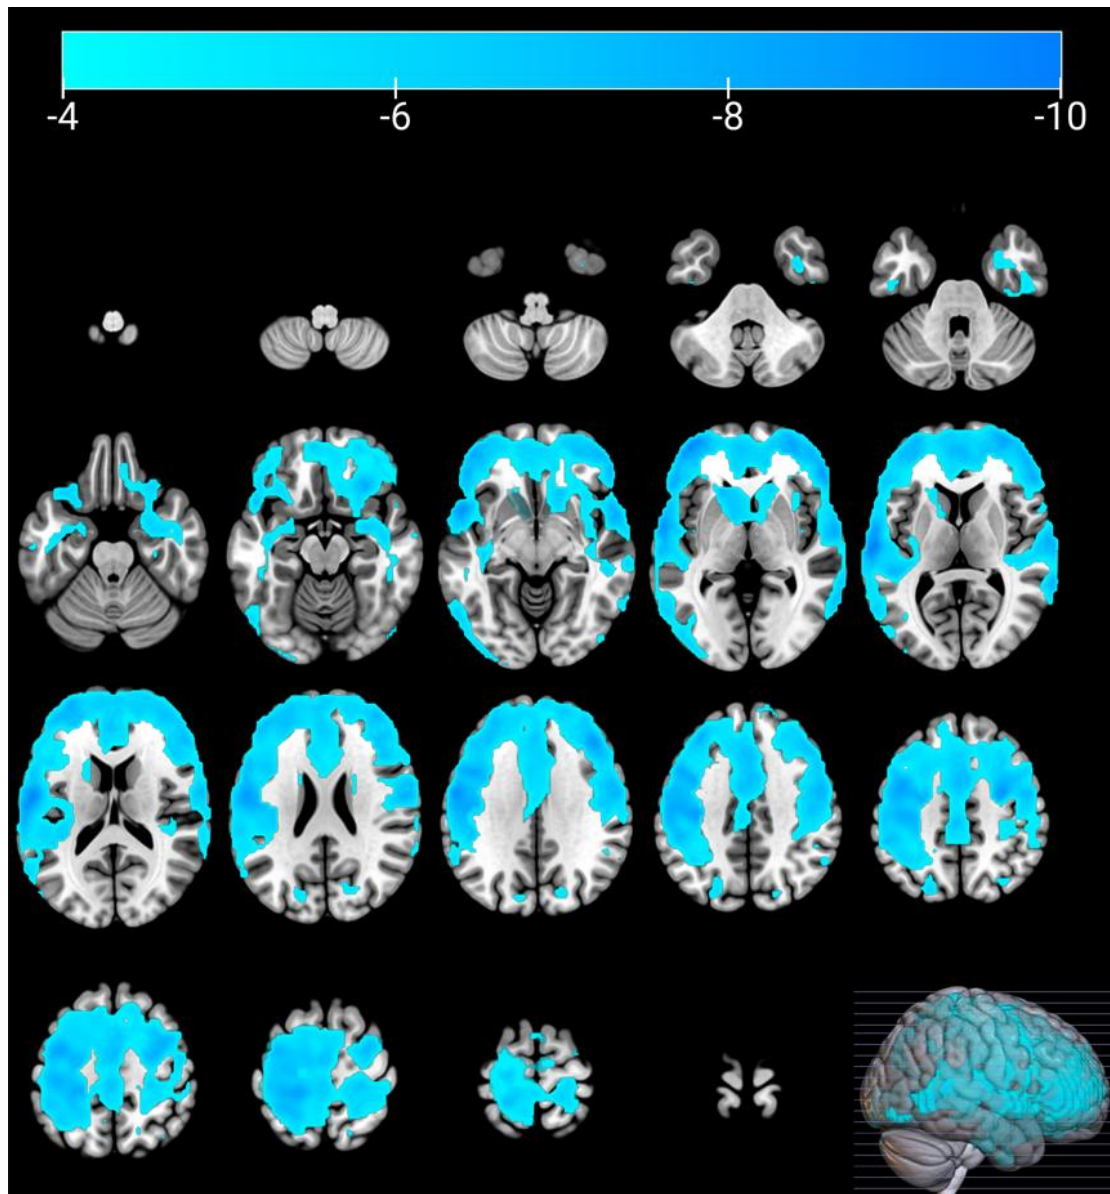

Figure S1 CVR mapping of T-values representing the difference between patients with moyamoya disease and healthy controls in the MNI space with certain occipital areas as reference, related to the data processing of the STAR Methods.

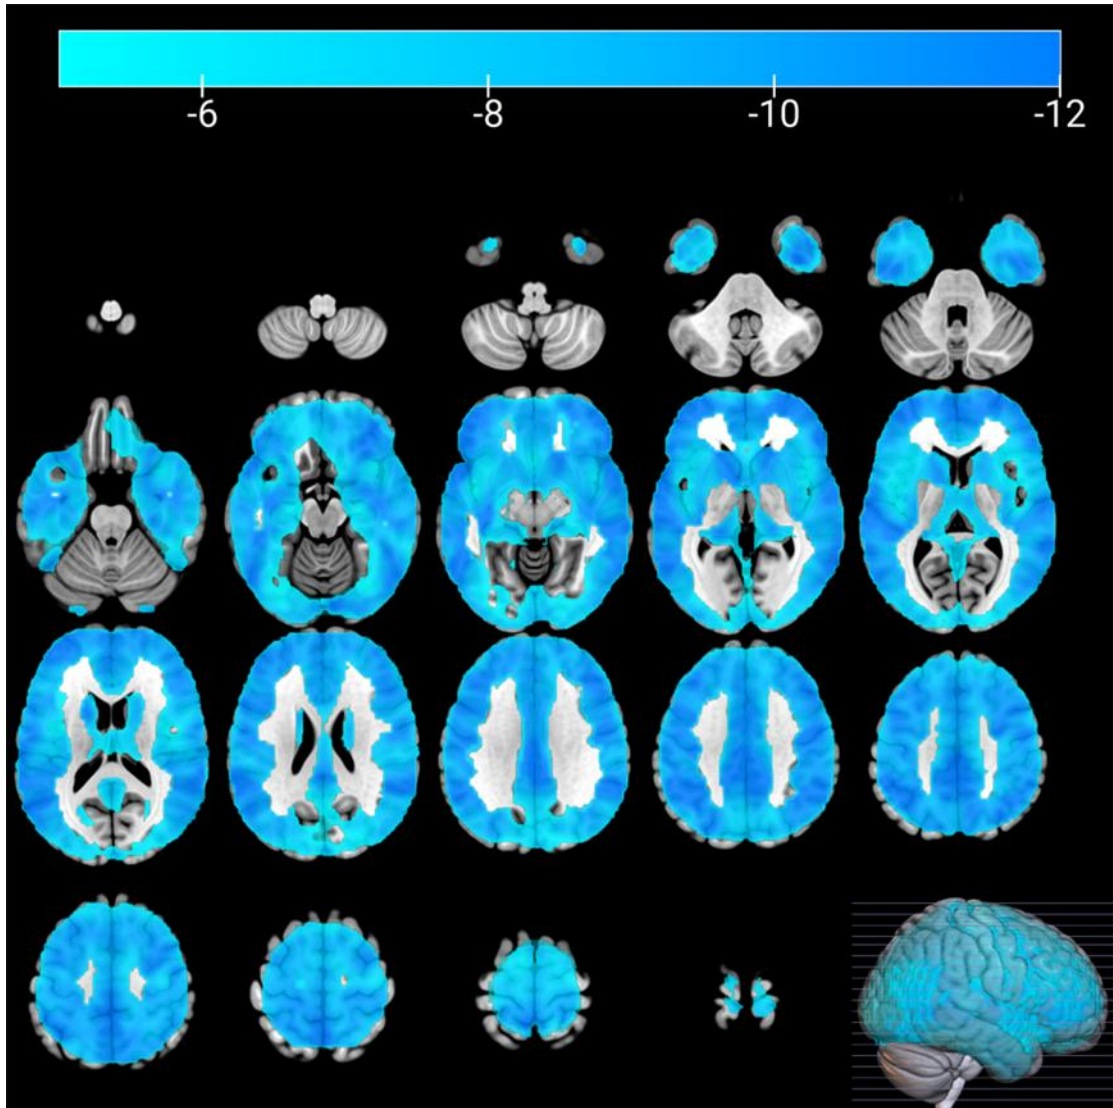

Figure S2 Pre experiment: CVR mapping of T-values representing the difference between patients with moyamoya disease and healthy controls in the MNI space with cerebellum as reference, related to the data processing of the STAR Methods.
